# Supplementary material for: T follicular helper and T follicular regulatory cells have different TCR specificity
Source: PubMed Central journal article supplement (PMC5413949; doi:10.1038/ncomms15067), 2017-04-21
Supplement: ncomms15067-s1.pdf [file ncomms15067-s1.pdf]

## Supplementary Figures

**a**

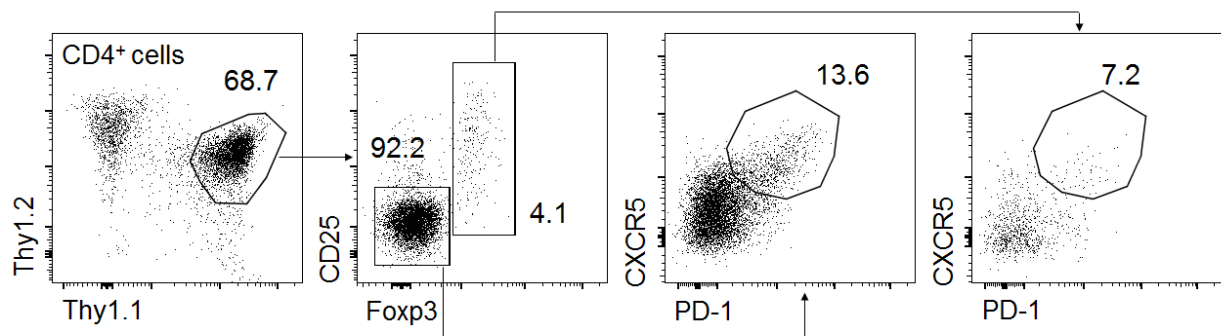

**b**

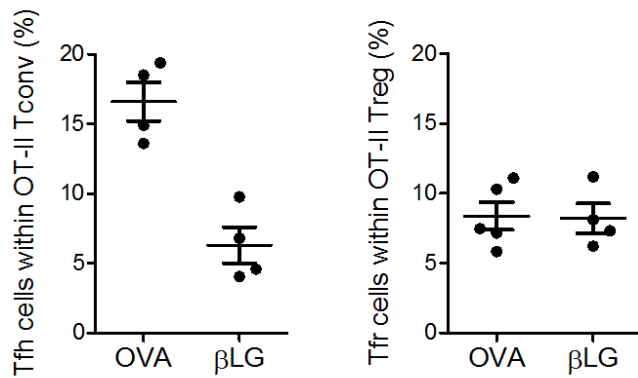

**Supplementary Figure 1.** *OT-II.Rag<sup>+</sup>Treg cells differentiate into Tfr cells independently of the immunization and keep Va2 and V $\beta$ 5 expression.* (a) Gating strategy to determine the percentage of OT-II Treg and Tconv cells that differentiate into Tfr and Tfh cells, respectively. (b) While the percentage of OT-II Tconv that differentiate into Tfh is higher in mice immunized with OVA than  $\beta$ LG (left), the same percentage of OT-II Treg originates Tfr cells in both immunizations (right). Mean  $\pm$  SEM presented for n=5.

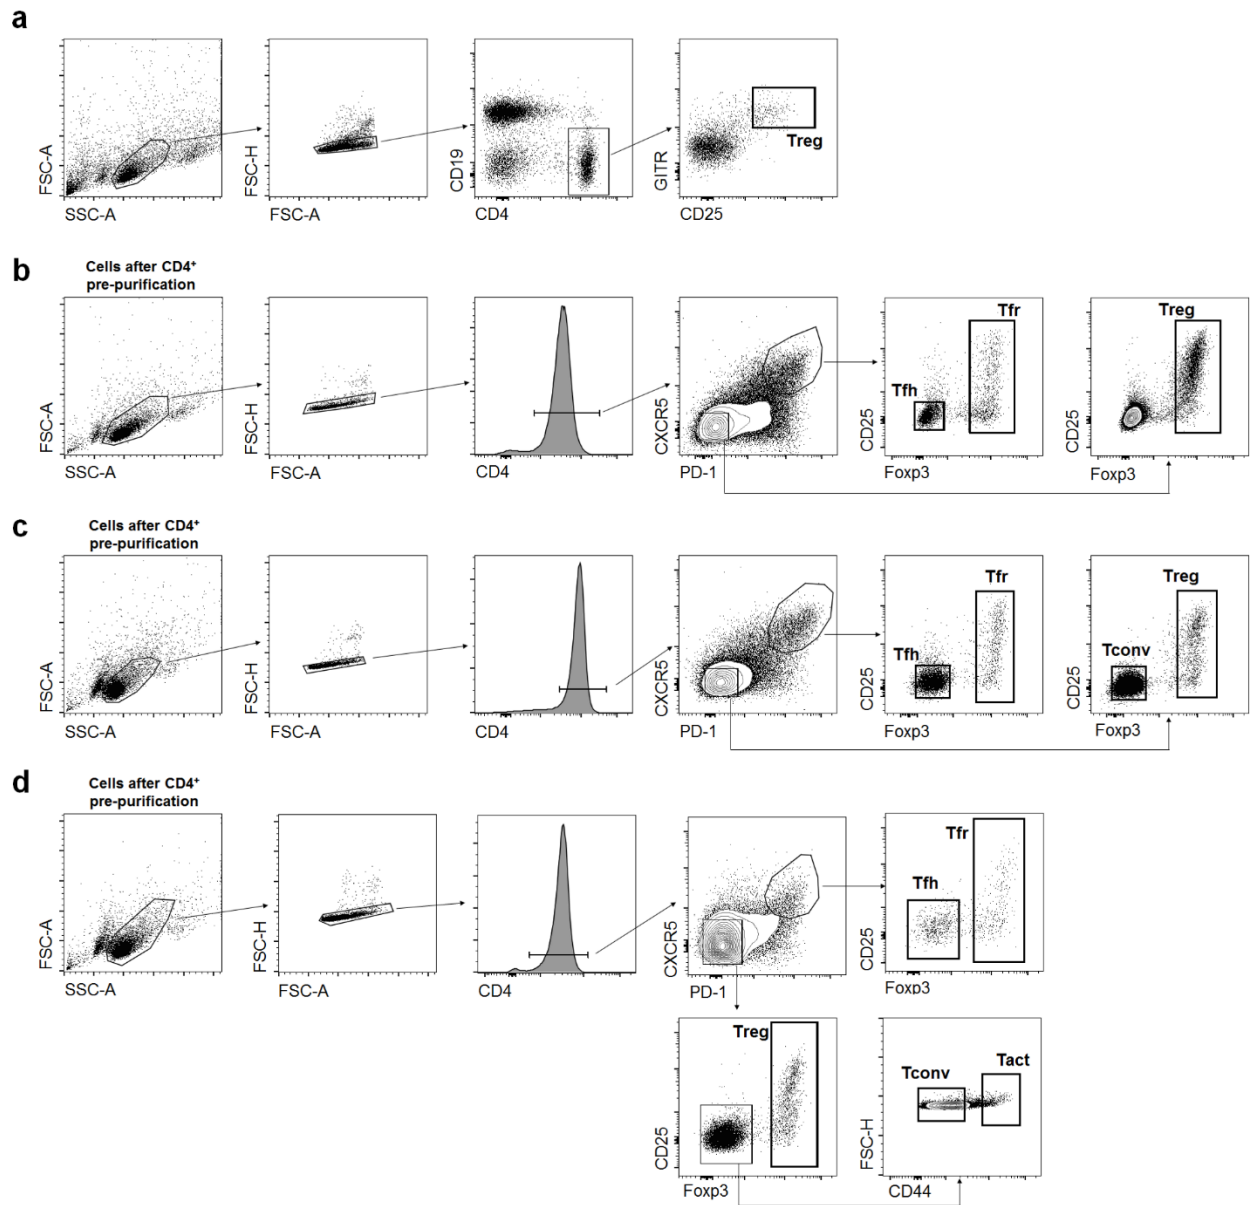

**Supplementary Figure 2. Gating strategies used for cell sorting.** (a) Gating strategy to sort Treg (CD4<sup>+</sup>CD25<sup>+</sup>GITR<sup>+</sup>) cells from OT-II.*Rag*<sup>+</sup> and C57BL/6 WT mice for *in vitro* cultures presented on Fig. 2g,h. (b) Gating strategy to sort Tfh (CD4<sup>+</sup>CXCR5<sup>+</sup>PD-1<sup>+</sup>Foxp3<sup>-</sup>), Tfr (CD4<sup>+</sup>CXCR5<sup>+</sup>PD-1<sup>+</sup>Foxp3<sup>+</sup>), and Treg (CD4<sup>+</sup>CXCR5<sup>-</sup>PD-1<sup>-</sup>Foxp3<sup>+</sup>) cells from *Foxp3*<sup>hCD2</sup> mice used on the *in vitro* proliferation assay presented on Fig. 4f-h. (c) Gating strategy to sort Tfh (CD4<sup>+</sup>CXCR5<sup>+</sup>PD-1<sup>+</sup>Foxp3<sup>-</sup>), Tfr (CD4<sup>+</sup>CXCR5<sup>+</sup>PD-1<sup>+</sup>Foxp3<sup>+</sup>), Treg (CD4<sup>+</sup>CXCR5<sup>-</sup>PD-1<sup>-</sup>Foxp3<sup>+</sup>), and Tconv (CD4<sup>+</sup>CXCR5<sup>-</sup>PD-1<sup>-</sup>Foxp3<sup>-</sup>) cells from *Foxp3*<sup>gfp</sup> mice for *TRBV* CDR3 spectratyping/Immunoscope analysis (Fig. 5). (d) Gating strategy to sort Tfh (CD4<sup>+</sup>CXCR5<sup>+</sup>PD-1<sup>+</sup>Foxp3<sup>-</sup>), Tfr (CD4<sup>+</sup>CXCR5<sup>+</sup>PD-1<sup>+</sup>Foxp3<sup>+</sup>), Treg (CD4<sup>+</sup>CXCR5<sup>-</sup>PD-1<sup>-</sup>Foxp3<sup>+</sup>), Tact (CD4<sup>+</sup>CXCR5<sup>-</sup>PD-1<sup>-</sup>Foxp3<sup>-</sup>CD44<sup>+</sup>), and Tconv (CD4<sup>+</sup>CXCR5<sup>-</sup>PD-1<sup>-</sup>Foxp3<sup>-</sup>CD44<sup>-</sup>) cells from 1D2 $\beta$  mice for *TRA* sequencing analysis (Fig. 6c-g). The same strategy was used to sort Tfh cells for the *in vitro* proliferation assay presented on Fig. 6b.

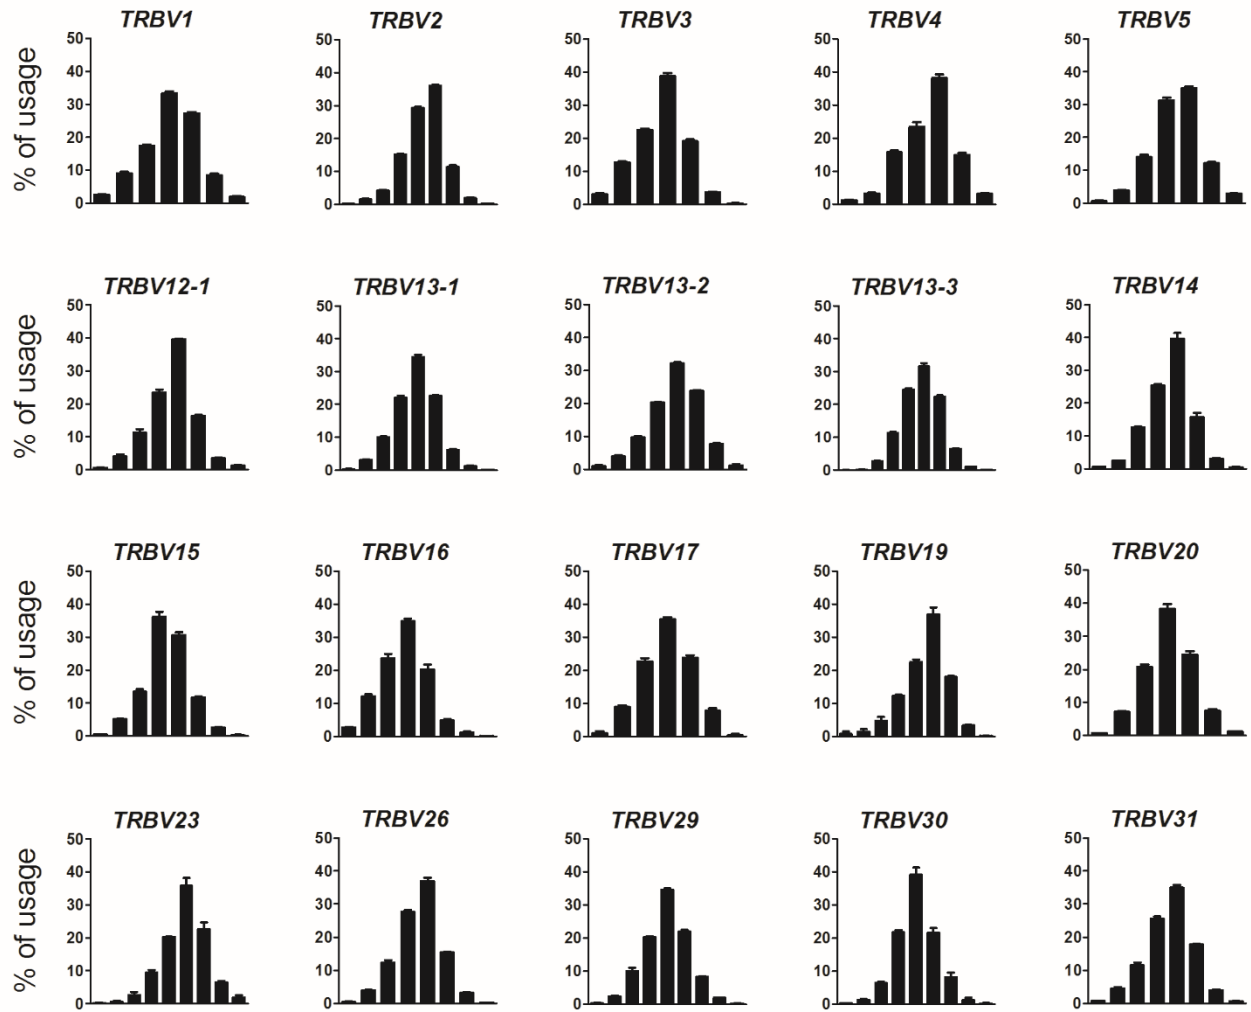

**Supplementary Figure 3.** CDR3 spectratypes obtained from naïve CD4<sup>+</sup> T cells. CDR3-length usage distribution of 20 TRBV segments from CD4<sup>+</sup> T cells from naïve mice that present a Gaussian-like distribution. Bar graphs present Mean  $\pm$  SEM of four samples.

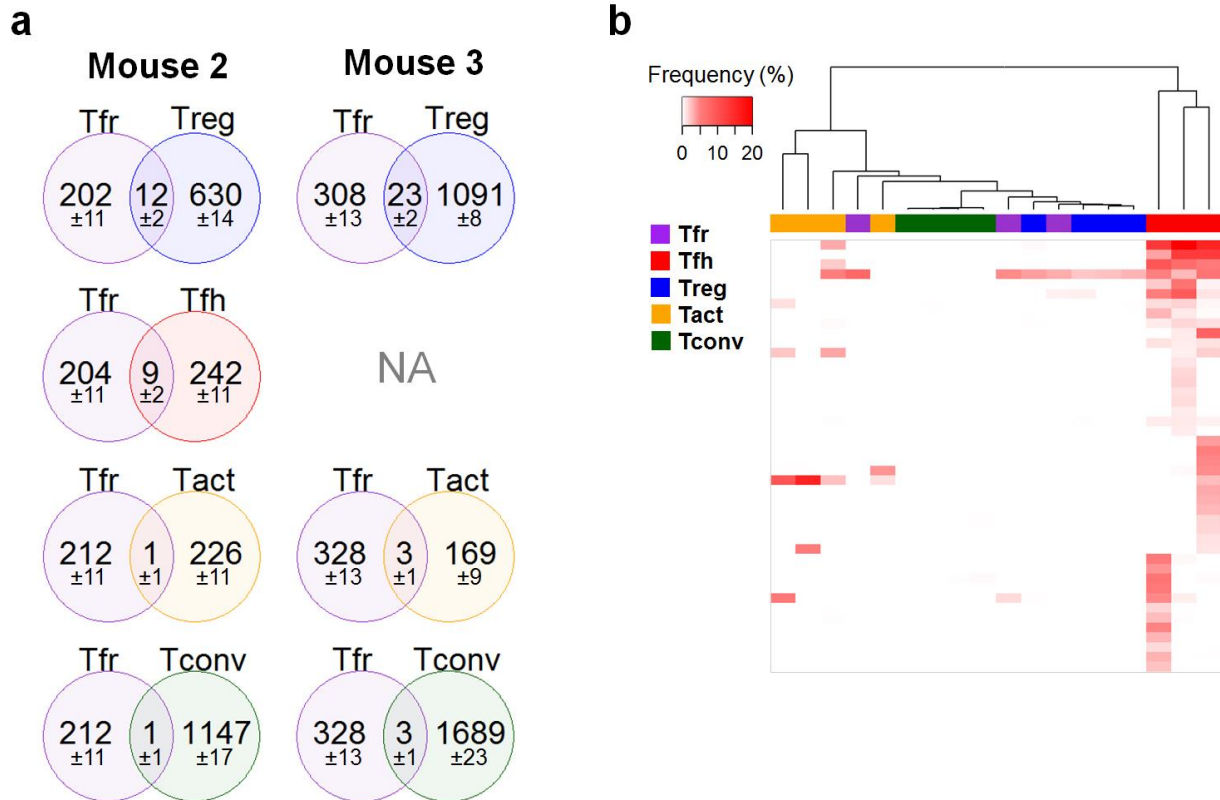

**Supplementary Figure 4.** Common clonotypes for *Tfr* cells and 20 most predominant clonotypes of *Tfh* samples. **(a)** Venn diagrams of the shared clonotypes between *Tfr* and other populations for mouse 2 and 3. Numbers presented are the Mean  $\pm$  SD of clonotypes identified after 100 iterations of the sampling process. As it was observed on Fig. 6, *Tfr* cells share more clonotypes with *Treg* cells. Sequencing results for *Tfh* sample of mouse 3 are not available (NA). **(b)** Heatmap and hierarchical clustering of the 20 most predominant clonotypes for each *Tfh* sample. The predominant clonotypes are mainly shared between *Tfh* samples and *Tact* samples.

## Supplementary Tables

**Supplementary Table 1.** Pairwise Multiple Comparison Analysis with Holm-Bonferroni Correction between Samples TRBV Perturbation Scores.

|               | Tconv1    | Tconv2    | Tconv3    | Tconv4    | Tfh1     | Tfh2      | Tfh3     | Tfr1  | Tfr2 | Tfr3 | Treg1 | Treg2 |
|---------------|-----------|-----------|-----------|-----------|----------|-----------|----------|-------|------|------|-------|-------|
| <b>Tconv2</b> | 1         | -         | -         | -         | -        | -         | -        | -     | -    | -    | -     | -     |
| <b>Tconv3</b> | 1         | 1         | -         | -         | -        | -         | -        | -     | -    | -    | -     | -     |
| <b>Tconv4</b> | 1         | 1         | 1         | -         | -        | -         | -        | -     | -    | -    | -     | -     |
| <b>Tfh1</b>   | 0,014 *   | 0,015 *   | 0,033 *   | 0,016 *   | -        | -         | -        | -     | -    | -    | -     | -     |
| <b>Tfh2</b>   | 0,000 *** | 0,000 *** | 0,000 *** | 0,000 *** | 0,673    | -         | -        | -     | -    | -    | -     | -     |
| <b>Tfh3</b>   | 0,007 **  | 0,009 **  | 0,012 *   | 0,009 **  | 1        | 0,473     | -        | -     | -    | -    | -     | -     |
| <b>Tfr1</b>   | 1         | 1         | 1         | 1         | 0,017 *  | 0,000 *** | 0,007 ** | -     | -    | -    | -     | -     |
| <b>Tfr2</b>   | 1         | 1         | 1         | 1         | 0,162    | 0,000 *** | 0,101    | 0,495 | -    | -    | -     | -     |
| <b>Tfr3</b>   | 1         | 1         | 1         | 1         | 0,002 ** | 0,000 *** | 0,002 ** | 1     | 1    | -    | -     | -     |
| <b>Treg1</b>  | 1         | 1         | 1         | 1         | 0,046 *  | 0,000 *** | 0,004 ** | 1     | 1    | 1    | -     | -     |
| <b>Treg2</b>  | 1         | 1         | 1         | 1         | 0,037 *  | 0,000 *** | 0,018 *  | 1     | 1    | 1    | 1     | -     |
| <b>Treg3</b>  | 1         | 1         | 1         | 1         | 0,007 ** | 0,000 *** | 0,007 ** | 1     | 1    | 1    | 1     | 1     |

p<0.05 \*, p<0.01 \*\*, p<0.001 \*\*\*

**Supplementary Table 2.** List of Primers Used on This Study.

| <b>Sequence</b>            | <b>Target gene/region</b>                 | <b>Orientation</b> | <b>Application</b> |
|----------------------------|-------------------------------------------|--------------------|--------------------|
| TCACTGATACGGAGCTGAGGC      | <i>TRBV1</i>                              | Forward            | Spectratyping      |
| GCCTCAAGTCGCTTCCAACCTC     | <i>TRBV2</i>                              | Forward            | Spectratyping      |
| CACTCTGAAAATCCAACCCAC      | <i>TRBV3</i>                              | Forward            | Spectratyping      |
| ATCAAGTCTGTAGAGCCGGAGGA    | <i>TRBV4</i>                              | Forward            | Spectratyping      |
| CTGAATGCCAGACAGCTCCAAGC    | <i>TRBV5</i>                              | Forward            | Spectratyping      |
| AAGGTGGAGAGAGACAAAGGATTC   | <i>TRBV12-1</i>                           | Forward            | Spectratyping      |
| CATTATGATAAAATGGAGAGAGAT   | <i>TRBV12-2</i>                           | Forward            | Spectratyping      |
| TGCTGGCAACCTTCGAATAGGA     | <i>TRBV13-1</i>                           | Forward            | Spectratyping      |
| CATTATTCATATGGTGCTGGC      | <i>TRBV13-2</i>                           | Forward            | Spectratyping      |
| CATTACTCATATGTCGCTGAC      | <i>TRBV13-3</i>                           | Forward            | Spectratyping      |
| AGGCCTAAAGGAACCTAACCAC     | <i>TRBV14</i>                             | Forward            | Spectratyping      |
| GATGGTGGGGCTTTCAAGGATC     | <i>TRBV15</i>                             | Forward            | Spectratyping      |
| GCACTCAACTCTGAAGATCCAGAGC  | <i>TRBV16</i>                             | Forward            | Spectratyping      |
| TCTCTCTACATTGGCTCTGCAGGC   | <i>TRBV17</i>                             | Forward            | Spectratyping      |
| CTCTCACTGTGACATCTGCCC      | <i>TRBV19</i>                             | Forward            | Spectratyping      |
| CCCATCAGTCATCCCAACTTATCC   | <i>TRBV20</i>                             | Forward            | Spectratyping      |
| CTGCTAAGAAACCATGTACCA      | <i>TRBV21</i>                             | Forward            | Spectratyping      |
| TCTGCAGCCTGGGAATCAGAA      | <i>TRBV23</i>                             | Forward            | Spectratyping      |
| AGTGTTCCCTCGAACTCACAG      | <i>TRBV24</i>                             | Forward            | Spectratyping      |
| CCTTGCAGCCTAGAAATTCAGT     | <i>TRBV26</i>                             | Forward            | Spectratyping      |
| TACAGGGTCTCACGGAAGAAGC     | <i>TRBV29</i>                             | Forward            | Spectratyping      |
| CAGCCGCCAAACCTAACATTCTC    | <i>TRBV30</i>                             | Forward            | Spectratyping      |
| ACGACCAATTCATCCTAAGCAC     | <i>TRBV31</i>                             | Forward            | Spectratyping      |
| GCCCATGGAAGTCACTTGGC       | <i>TRBC(1)</i>                            | Reverse            | Spectratyping      |
| FAM-CTTGGGTGGAGTCACATTTCTC | <i>TRBC(2)</i><br>(spectratyping run-off) | Reverse            | Spectratyping      |
| CAACGCAGAGTGGCCATTAC       | Mint-2 universal adapter                  | Forward            | Sequencing         |
| GCAGGTGAAGCTTGTCTGGT       | <i>TRAC</i>                               | Reverse            | Sequencing         |
